# Supplementary material for: A Highly Sensitive and Selective Nano-Fluorescent Probe for Ratiometric and Visual Detection of Oxytetracycline Benefiting from Dual Roles of Nitrogen-Doped Carbon Dots
Source: MDPI journal article supplement (doi:10.3390/nano12234306), 2022-12-04
Supplement: s1 [file s1]

# A Highly Sensitive and Selective Nano-Fluorescent Probe for Ratiometric and Visual Detection of Oxytetracycline Benefiting from Dual Roles of Nitrogen-Doped Carbon Dots

Huifang Wu \*, Mengqi Xu, Yubing Chen, Haoliang Zhang, Yongjun Shen and Yanfeng Tang \*

Nantong Key Lab of Intelligent and New Energy Materials, School of Chemistry and Chemical Engineering, Nantong University, Nantong 226019, China

\* Correspondence: whf0125@ntu.edu.cn (H.W.); tangyf@ntu.edu.cn (Y.T.)

## Apparatus and characterization

The morphologies and sizes of the NCDs were characterized by JEM-2100F transmission electron microscopy (TEM, JEOL, Japan). The elemental compositions and contents of NCDs were analyzed with SIRION-100 X-ray energy dispersive spectroscopy (EDX, PEI, Netherlands). The X-ray diffraction (XRD) pattern was recorded on a D8 advance X-ray diffractometer (Bruker, Germany). Chemical compositions and valency were analyzed by X-ray photoelectron spectroscopy (XPS) performed on a Thermo Kalpha spectrometer (Thermo Fisher Scientific, USA) using a 1486.6 eV Al K $\alpha$  line excitation source. Fourier-transform infrared (FT-IR) spectra were recorded on a Nicolet IS10 FT-IR spectrometer (Thermo Fisher Scientific, USA) with KBr plates. Fluorescence spectra were collected with an F-7000 spectrofluorimeter (Hitachi, Japan) with the photomultiplier tube voltage set at 400 V. Fluorescence lifetime curves and fluorescence quantum yield were generated on a FLS-1000 steady-state and time-resolved spectrofluorimeter (Edinburgh, England). UV-Vis spectra were recorded on a UV-3600 spectrophotometer (Shimadzu, Japan). All pH measurements were performed on a FE28-standard pH meter (Mettler Toledo, Switzerland).

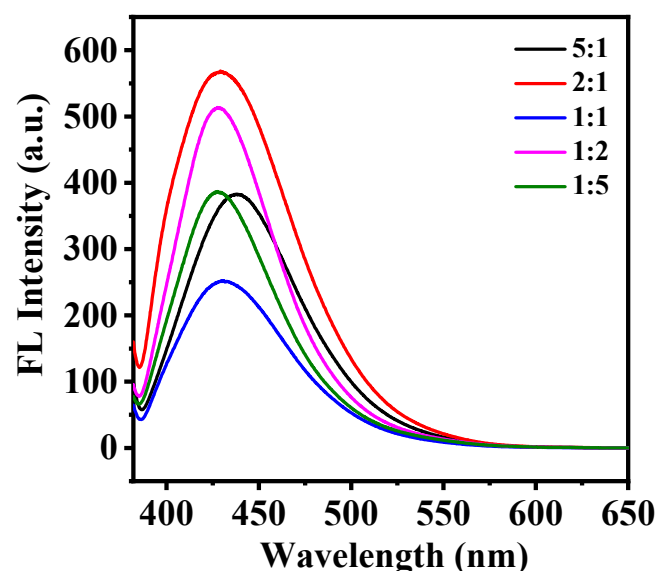

Figure S1. Fluorescence spectra of NCDs synthesized with different MCA/MUA.

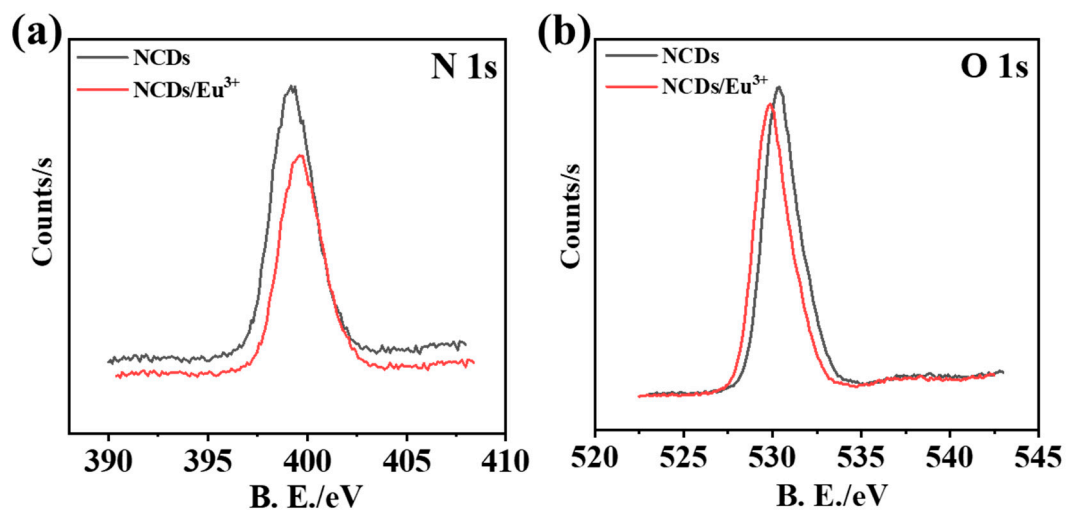

Figure S2. The high-resolution N1s (a) and O1s (b) spectra of NCDs and NCDs/Eu<sup>3+</sup>.

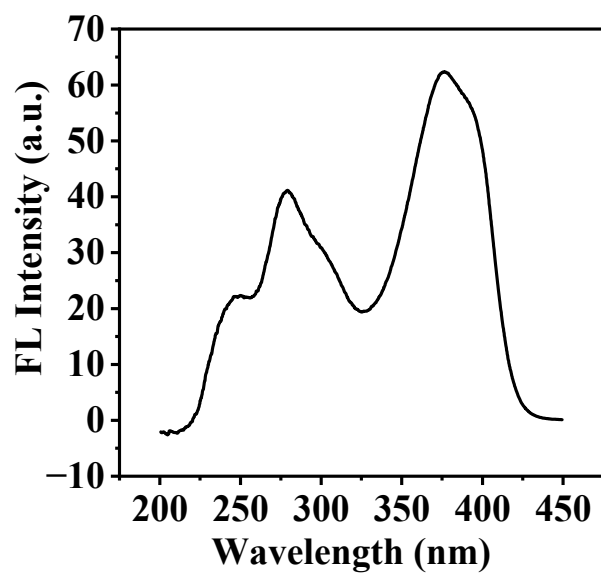

Figure S3. Excitation spectra of NCDs/Eu<sup>3+</sup>-OTC.

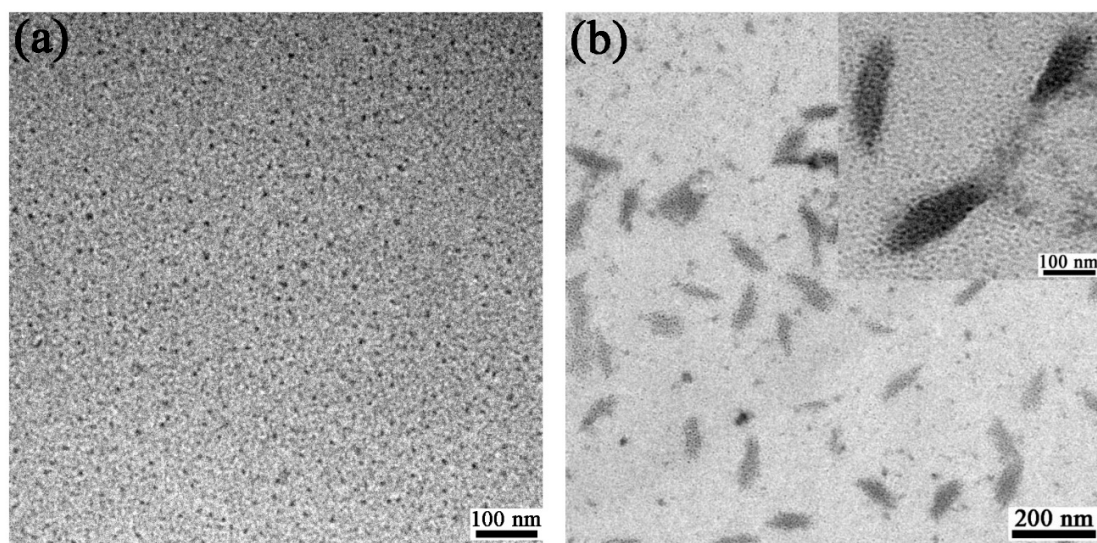

Figure S4. TEM images of NCDs/Eu<sup>3+</sup> before (a) and after (b) incubation with OTC.

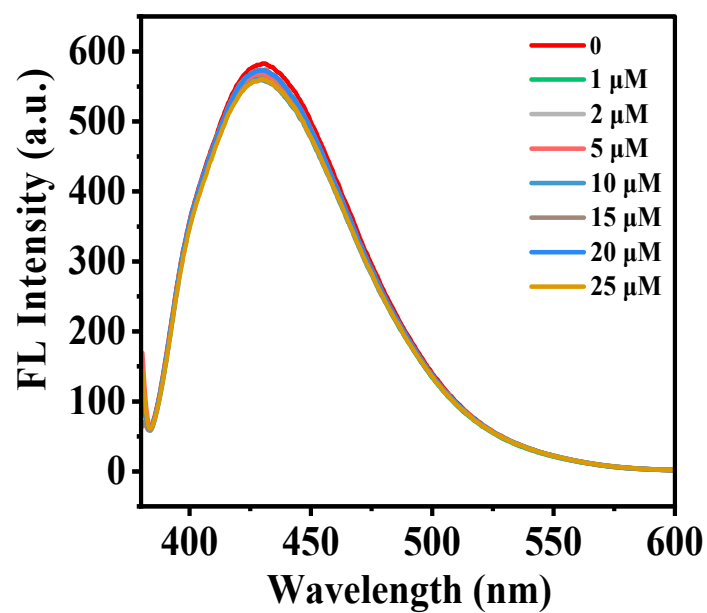

Figure S5. Effect of OTC at different concentrations on the fluorescence spectra of NCDs.

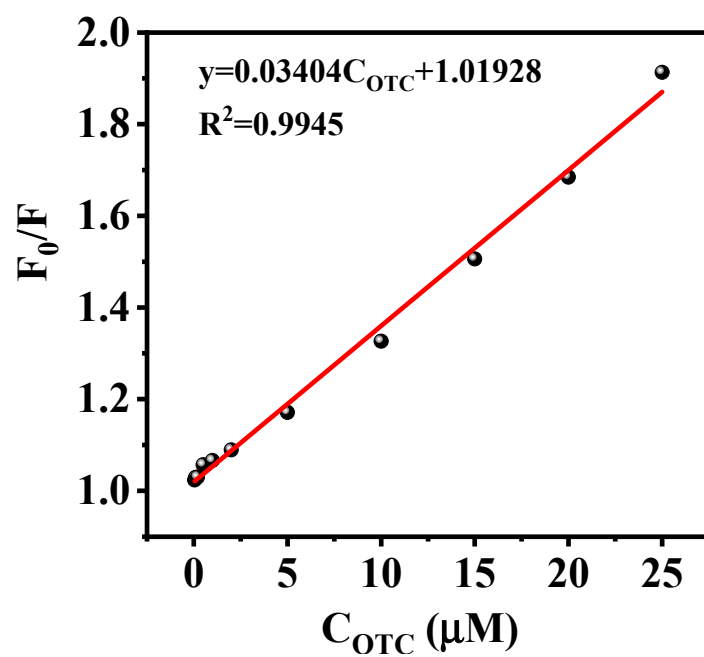

Figure S6. Stern–Volmer plot of NCDs/Eu<sup>3+</sup> probe after addition of OTC in the range of 0.1–25  $\mu\text{M}$ .

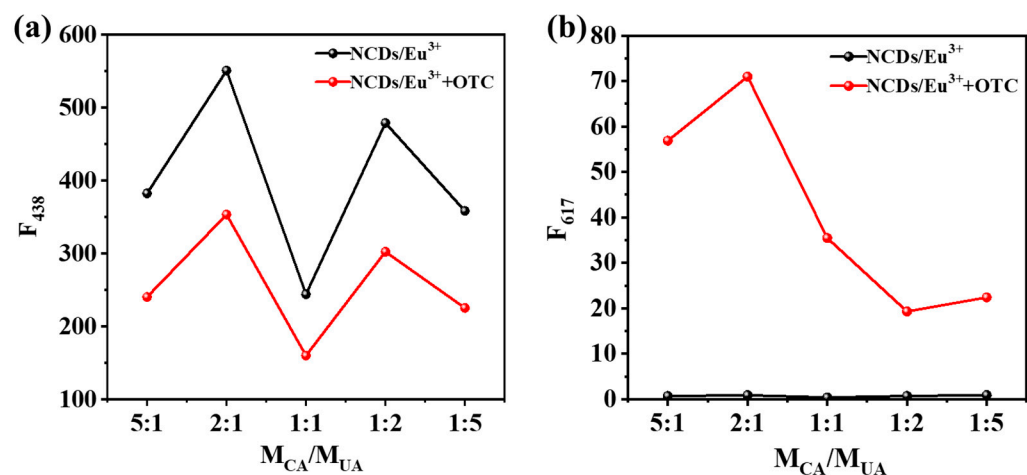

**Figure S7.** Effect of  $M_{CA}/M_{UA}$  on  $F_{438}$  and  $F_{617}$  of the probe before (a) and after (b) incubation with OTC. NCDs: 20  $mg \cdot L^{-1}$ ;  $Eu^{3+}$ : 60  $\mu M$ ; OTC: 20  $\mu M$ ; HEPES buffer: 10 mM (pH=7.0).

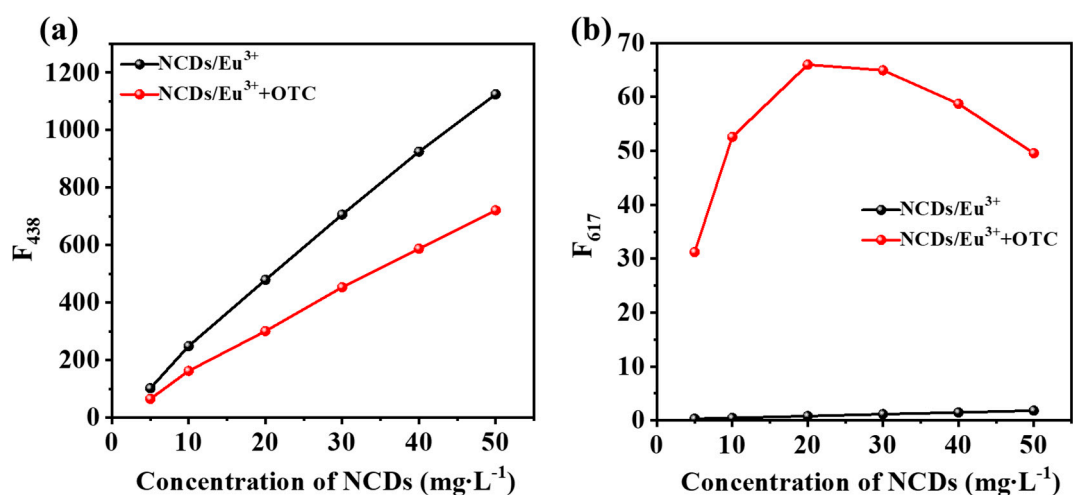

**Figure S8.** Effect of NCD concentration on  $F_{438}$  and  $F_{617}$  of the probe before (a) and after (b) incubation with OTC.  $Eu^{3+}$ : 60  $\mu M$ ; OTC: 20  $\mu M$ ; HEPES buffer: 10 mM (pH=7.0).

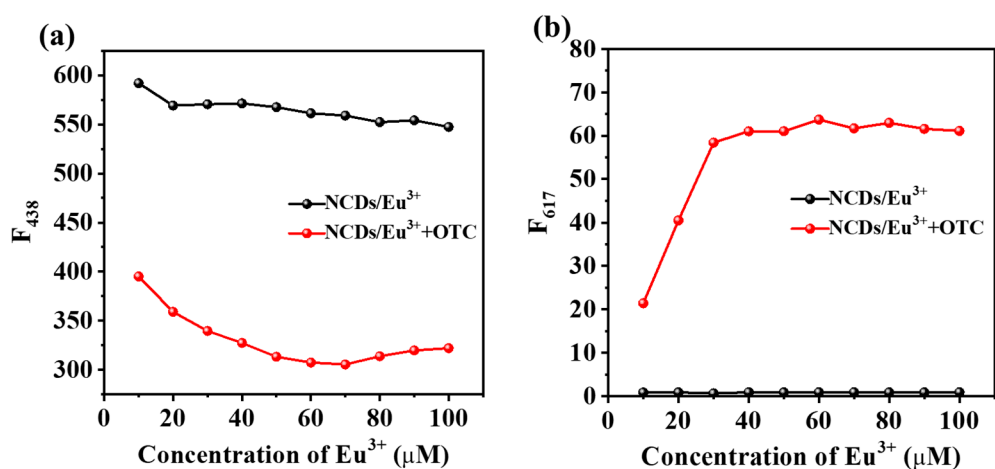

**Figure S9.** Effect of  $Eu^{3+}$  concentration on  $F_{438}$  and  $F_{617}$  of the probe before (a) and after (b) incubation with OTC. NCDs: 20  $mg \cdot L^{-1}$ ; OTC: 20  $\mu M$ ; HEPES buffer: 10 mM (pH=7.0).

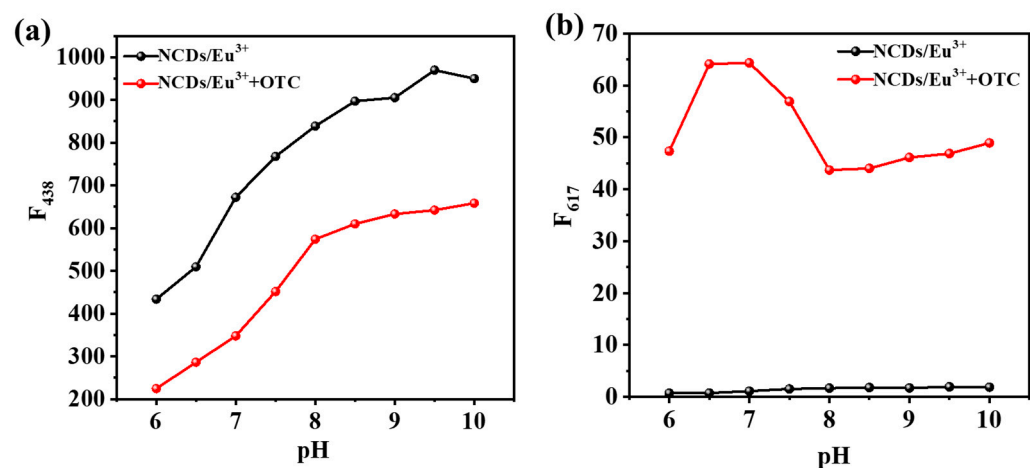

**Figure S10.** Effect of pH on  $F_{438}$  and  $F_{617}$  of the probe before (a) and after (b) incubation with OTC.  $\text{Eu}^{3+}$ : 60  $\mu\text{M}$ ; OTC: 20  $\mu\text{M}$ ; HEPES buffer: 10 mM (pH=7.0).

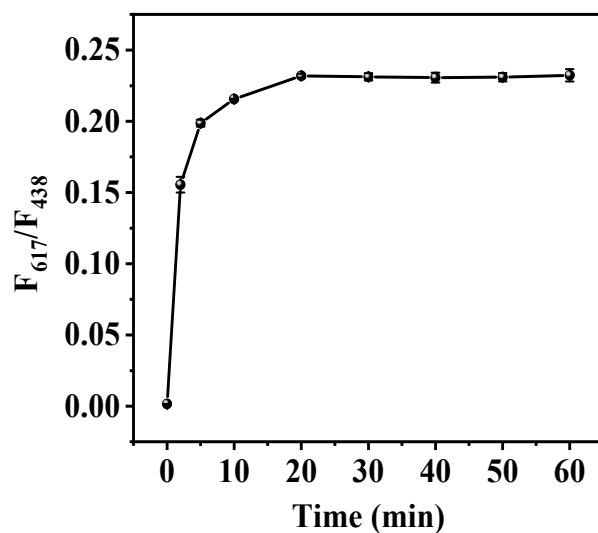

**Figure S11.** Effect of incubation time on  $F_{617}/F_{438}$ . NCDs: 20  $\text{mg}\cdot\text{L}^{-1}$ ;  $\text{Eu}^{3+}$ : 60  $\mu\text{M}$ ; OTC: 20  $\mu\text{M}$ ; HEPES buffer: 10 mM (pH=7.0).

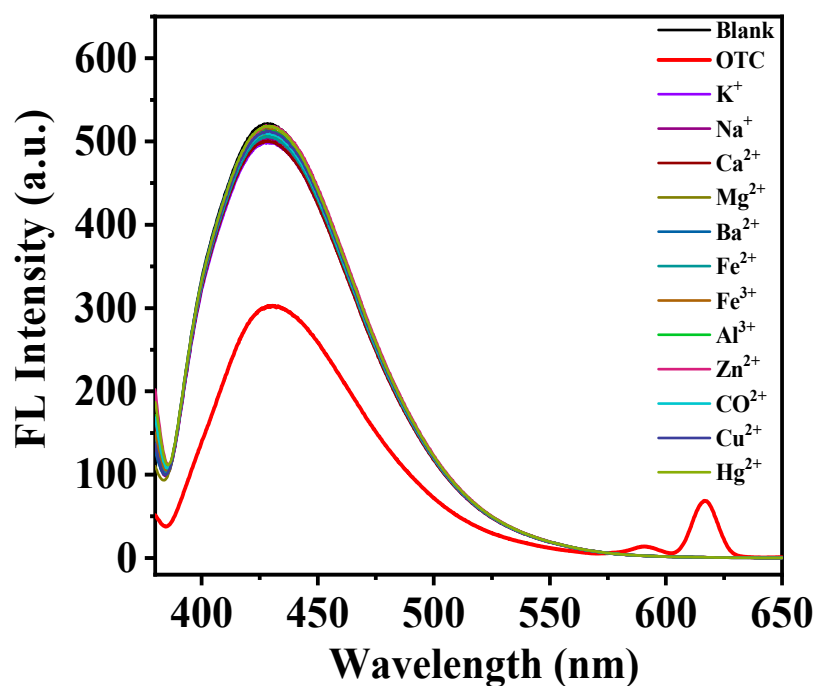

**Figure S12.** The effect of other cations on the fluorescence spectra of NCDs/Eu<sup>3+</sup>.

**Table S1.** The reproducibility of NCD physical properties.

| NCDs   | Particle size (nm) | Fluorescence quantum yield (%) | Fluorescence lifetime (ns) | Excitation wavelength- and pH-dependent optical property |
|--------|--------------------|--------------------------------|----------------------------|----------------------------------------------------------|
| NCDs 1 | 4.89 ± 0.37        | 16.10                          | 4.01                       | yes                                                      |
| NCDs 2 | 4.02 ± 0.30        | 14.95                          | 3.03                       | yes                                                      |
| NCDs 3 | 4.55 ± 0.25        | 15.48                          | 3.17                       | yes                                                      |

**Table S2.** The reproducibility of NCDs analytical properties for OTC detection.

| NCDs   | Quantitative range for OTC | LOD for OTC | Selectivity for OTC |
|--------|----------------------------|-------------|---------------------|
| NCDs 1 | 0.1–25 µM                  | 40 nM       | yes                 |
| NCDs 2 | 0.1–25 µM                  | 18 nM       | yes                 |
| NCDs 3 | 0.1–25 µM                  | 29 nM       | yes                 |

**Table S3.** Comparison of fluorescent probes for OTC detection.

| Material applied          | Targets                               | Linear range               | LOD               | Ref. |
|---------------------------|---------------------------------------|----------------------------|-------------------|------|
| piperazine modified CQDs  | OTC                                   | 0–10 µM                    | –                 | [1]  |
| GQDs-Eu <sup>3+</sup>     | TC <sup>a</sup> /OTC/DXC <sup>b</sup> | 0–20 µM                    | 8.2 nM            | [2]  |
| Al-MOF                    | TC <sup>a</sup> /OTC/DXC <sup>b</sup> | 0–72.33/0–86.67/0–66.67 µM | 26/62/40 nM       | [3]  |
| luminescent MOF (In-sbdc) | TC <sup>a</sup> /OTC/CTC <sup>c</sup> | 0–30 µM                    | 0.28/0.30/0.30 µM | [4]  |
| BNQD-Eu <sup>3+</sup>     | TC <sup>a</sup> /OTC/DXC <sup>b</sup> | 0–50 µM                    | 19/104/28 nM      | [5]  |
| CDs-Eu <sup>3+</sup>      | OTC                                   | 2.5–10 µM                  | 9.59 nM           | [6]  |
| DPA-Ce-GMP-Eu             | OTC                                   | 0.01–45 µM                 | 6.6 nM            | [7]  |
| CDs                       | OTC                                   | 0–40 µM                    | 410 nM            | [8]  |

| NCDs/Eu <sup>3+</sup>           | OTC | 0.1–25 $\mu$ M | 29 nM | This work |
|---------------------------------|-----|----------------|-------|-----------|
| <sup>a</sup> tetracycline;      |     |                |       |           |
| <sup>b</sup> doxycycline;       |     |                |       |           |
| <sup>c</sup> chlortetracycline; |     |                |       |           |

## References

- [1] Yang L.; Zhao H.T.; Liu N.; Wang W. A target analyte induced fluorescence band shift of piperazine modified carbon quantum dots: a specific visual detection method for oxytetracycline. *Chem. Commun.* **2019**, 55, 12364.
- [2] Li W.; Zhu J.; Xie G.; Ren Y.; Zheng Y. Q. Ratiometric system based on graphene quantum dots and Eu3p for selective detection of tetracyclines, *Anal. Chim. Acta.* **2018**, 1022, 131-137.
- [3] Li C.; Zhu L.; Yang W.; He X.; Zhao S.; Zhang X.; Tang W.; Wang J.; Yue T.; Li Z. Amino-functionalized Al-MOF for fluorescent detection of tetracyclines in milk. *J. Agric. Food Chem.*, **2019**, 67, 1277-1283.
- [4] Liu Q.; Ning D.; Li W. J.; Du X. M.; Wang Q.; Li, Y.; Ruan W. J. Metal-organic framework-based fluorescent sensing of tetracycline-type antibiotics applicable to environmental and food analysis. *Analyst*, **2019**, 144, 1916-1922.
- [5] Yang K.; Jia P.; Hou J.; Bu T.; Sun X.; Liu Y.; Wang L. Innovative dual-emitting ratiometric fluorescence sensor for tetracyclines detection based on boron nitride quantum dots and europium ions, *ACS Sustain. Chem. Eng.* **2020**, 8, 17185-17193.
- [6] Wang Q.; Li X.C.; Yang K.; Zhao S.J.; Zhu S.H.; Wang B.H.; Yi J.N.; Zhang Y.; Song X.Z.; Lan M.H. Carbon dots and Eu<sup>3+</sup> hybrid-based ratiometric fluorescent probe for oxytetracycline detection. *Ind. Eng. Chem. Res.* **2022**, 61, 5825–5832
- [7] Wang T.; Mei Q.; Tao Z.; Wu H., Zhao M., Wang S.; Liu Y. A smartphone-integrated ratiometric fluorescence sensing platform for visual and quantitative point-of-care testing of tetracycline, *Biosens. Bioelectron.* **2020**, 148, 111791-111798.
- [8] Fu Y.Z.; Huang L.; Zhao S.J.; Xing X.J.; Lan M.H.; Song X.Z. A carbon dot-based fluorometric probe for oxytetracycline detection utilizing a Förster resonance energy transfer mechanism, *Spectrochim. Acta A* **2021**, 246, 118947.
